# Supplementary material
Source: publisher figshare collection journal article supplement (https://gsajournals.figshare.com/ndownloader/files/18059195)
Supplement: Supplementary file 1 [file 18059195]

**Table S2. Animals used to provide tissue samples**

F=female; M=male

| **Tissue** | **Animal** |
| --- | --- |
| Liver | F6849, F9150, F6852, M4046, M4075, M4091 |
| Kidney | F6849, F9150, M4046, M4075, M4091 |
| Spleen | F6849, F9150, M4046, M4075, M4091 |
| Lung | F6849 |
| Heart | F6849 |
| Pancreas | F9150 |
| Thymus | F9150 |
